# Supplementary material for: Novel lead structures with both Plasmodium falciparum gametocytocidal and asexual blood stage activity identified from high throughput compound screening
Source: PubMed Central journal article supplement (PMC5390467; doi:10.1186/s12936-017-1805-0), 2017-04-13

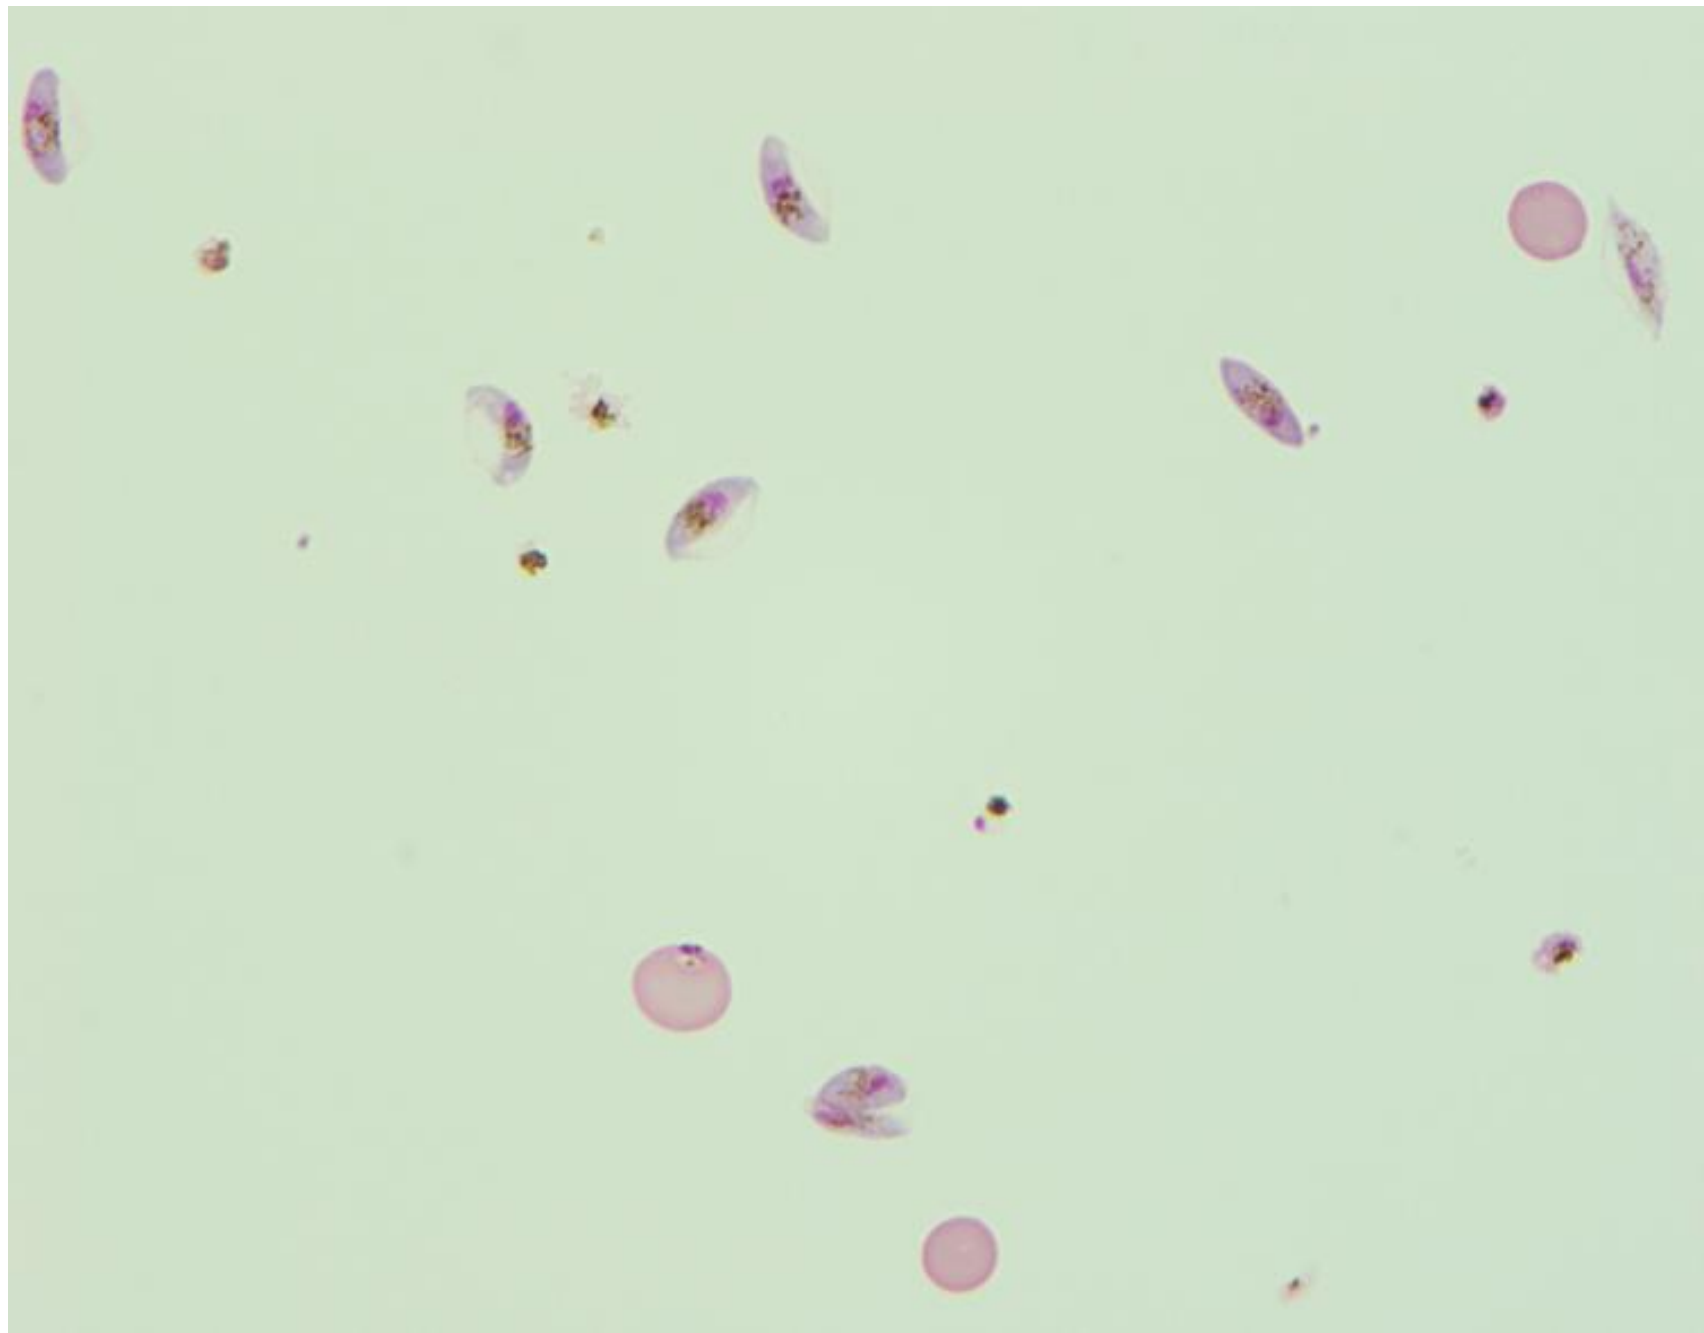

Supplement: 12936_2017_1805_MOESM1_ESM.pdf [file 12936_2017_1805_MOESM1_ESM.pdf]
